# Supplementary material for: Evaluation of a Serum-Free Medium for Human Epithelial and Stromal Cell Culture
Source: MDPI journal article supplement (doi:10.3390/ijms231710035), 2022-09-02

**Figure S1A: Morphology of KC at passages 1, 2 and 3.**

Morphology of keratinocytes after four days (P1 d4: passage one, day 4), 11 days (P2 d4: passage two, day 4) and 18 days (P3 d4: passage three, day 4) of culture in serum-free medium or fetal bovine serum-containing medium. Experiments were performed in triplicate, and a representative image is shown. The images were captured at 10X magnification with a scale bare of 100 $\mu$ m.

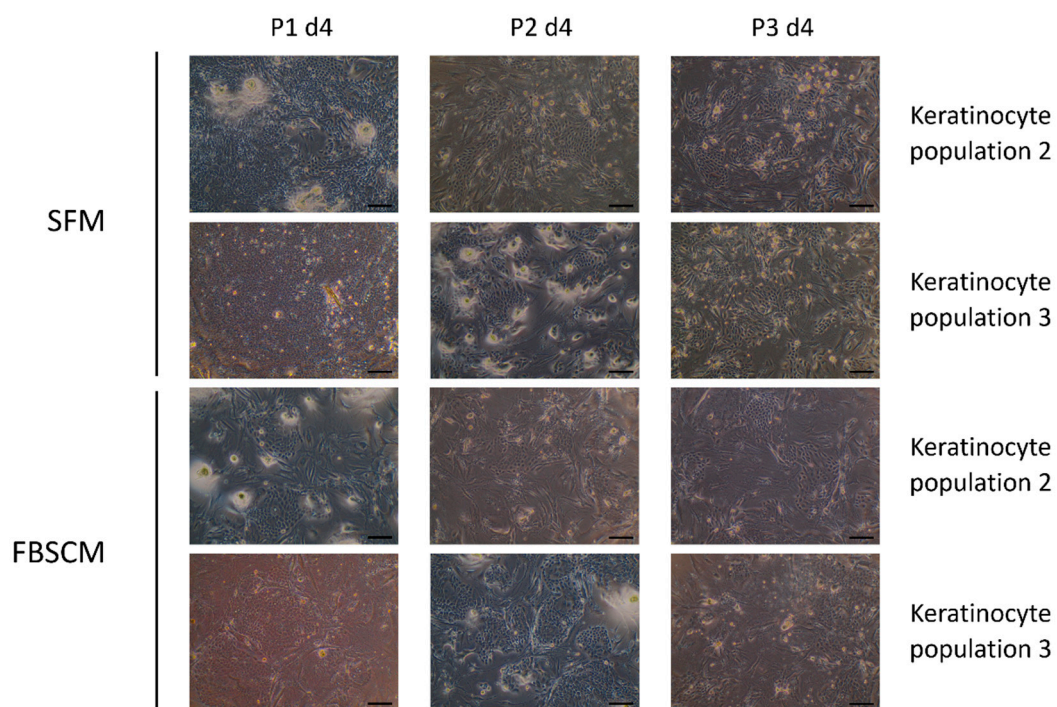

**Figure S1B: Morphology of UC at passages 1, 2 and 3.**

Morphology of urothelial cells after four days (P1 d4: passage one, day 4), 11 days (P2 d4: passage two, day 4) and 18 days (P3 d4: passage three, day 4) of culture in serum-free medium or fetal bovine serum-containing medium. Experiments were performed in triplicate, and a representative image is shown. The images were captured at 10X magnification with a scale bare of 100 $\mu$ m.

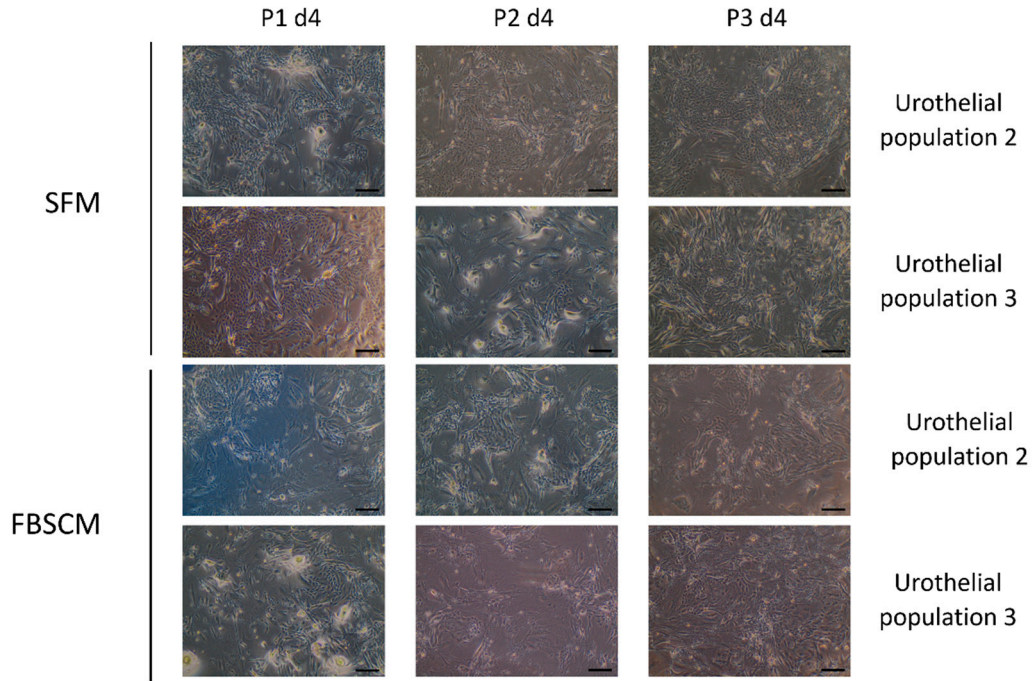

**Figure S1C: Morphology of DF at passages 1, 2 and 3.**

Morphology of dermal fibroblasts after four days (P1 d4: passage one, day 4), 11 days (P2 d4: passage two, day 4) and 18 days (P3 d4: passage three, day 4) of culture in serum-free medium or fetal bovine serum-containing medium. Experiments were performed in triplicate, and a representative image is shown. The images were captured at 10X magnification with a scale bare of 100 $\mu$ m.

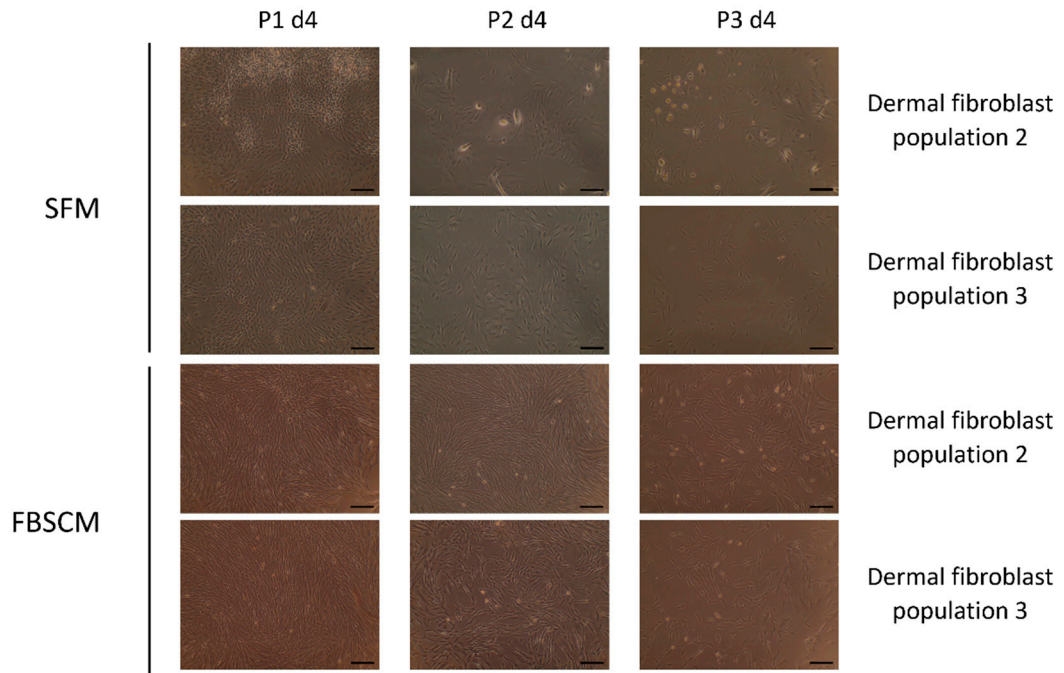

**Figure S1D: Morphology of DF at passages 1, 2 and 3.**

Morphology of vesical fibroblasts after four days (P1 d4: passage one, day 4), 11 days (P2 d4: passage two, day 4) and 18 days (P3 d4: passage three, day 4) of culture in serum-free medium or fetal bovine serum-containing medium. Experiments were performed in triplicate, and a representative image is shown. The images were captured at 10X magnification with a scale bare of 100μm.

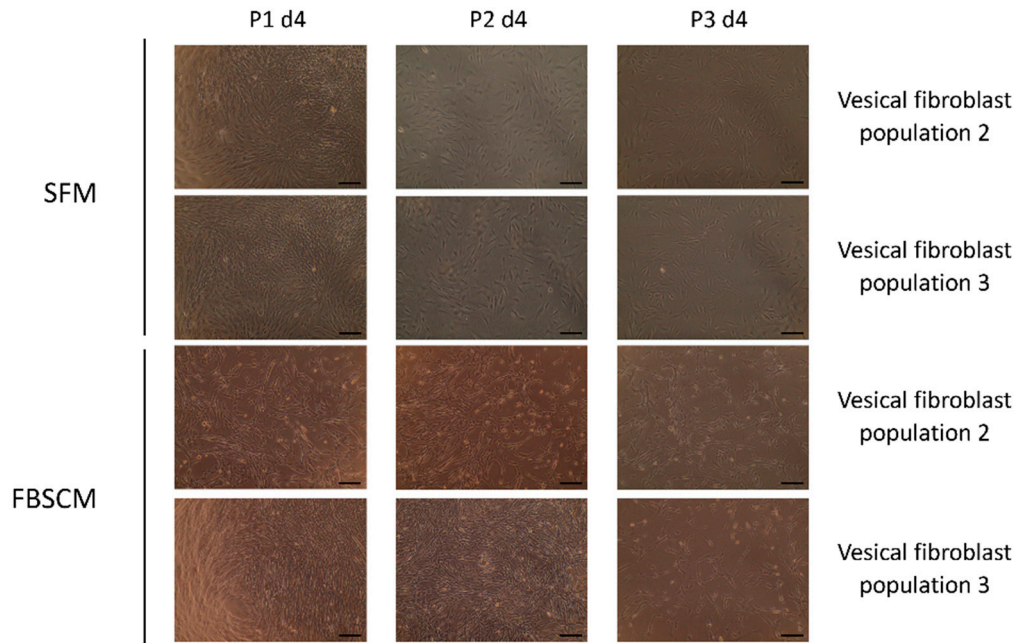

**Figure S2A: Cell size evaluation of epithelial cells.**

Cell size evaluation of keratinocytes (KC) and urothelial cells (UC) each day for three passages. Each dot represents the mean cell size of a cellular population realized in triplicate (N=3, n=3).

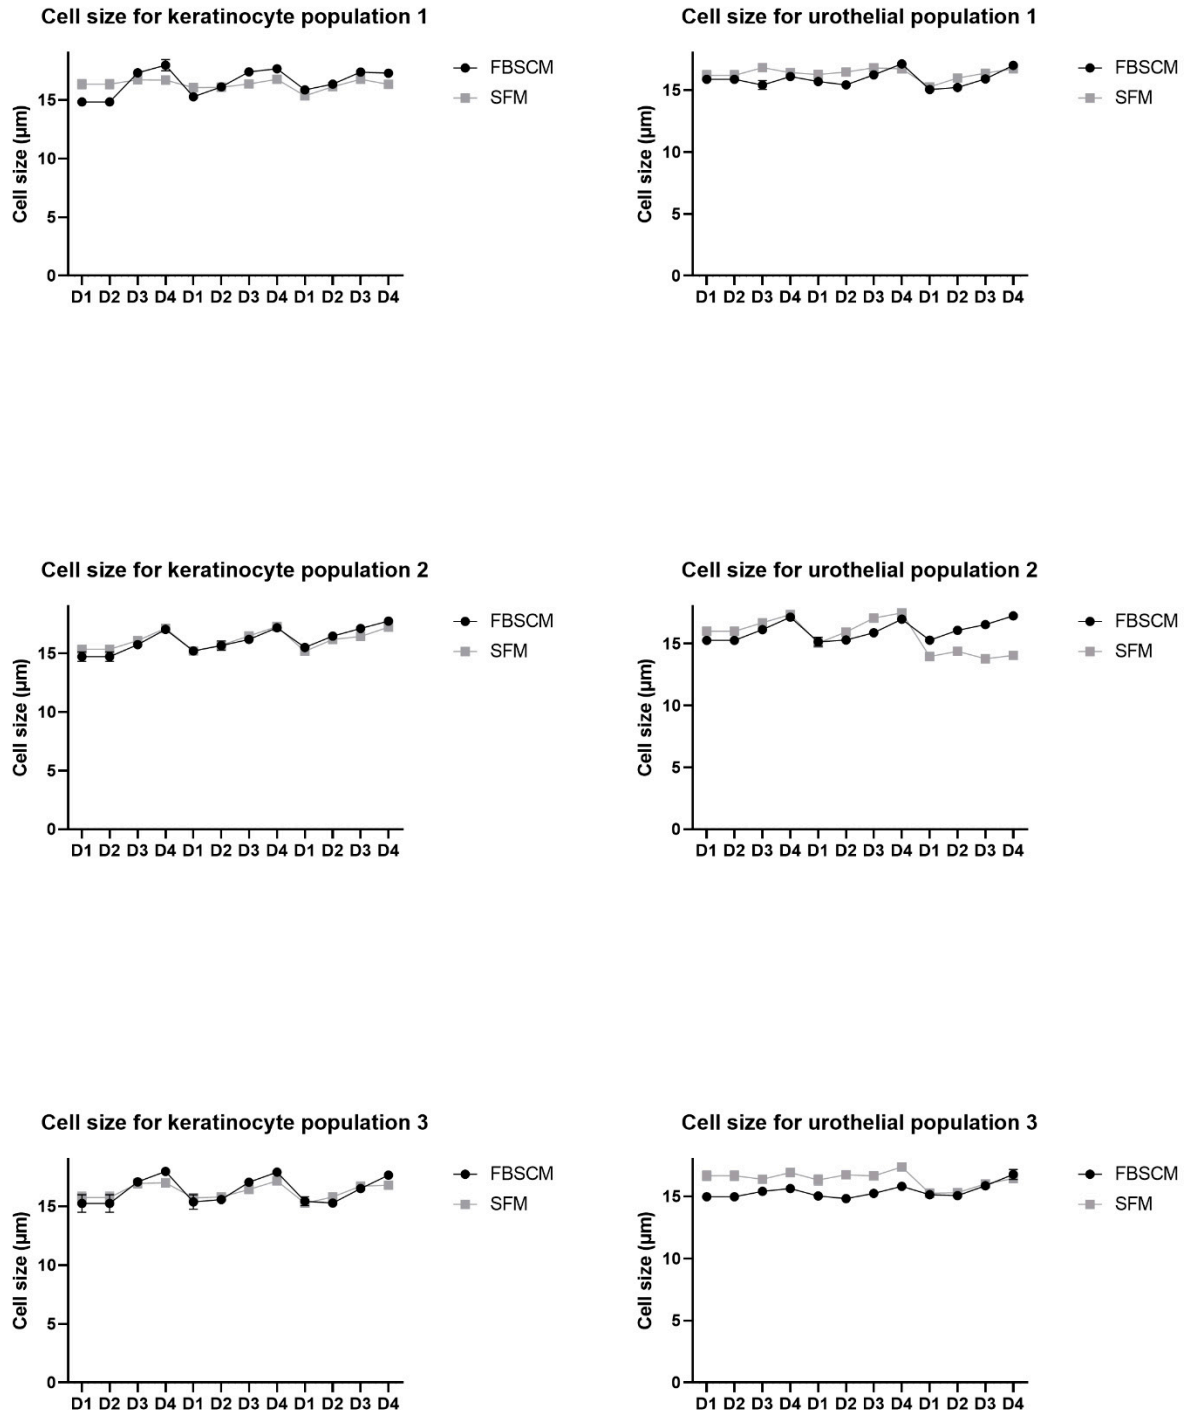



**Figure S2B: Cell size evaluation of fibroblast cells.**

For three passages, the cell size evaluation of dermal fibroblasts (DF) and vesical fibroblasts (VF) each day. Each dot represents the mean cell size of a cellular population realized in triplicate (N=3, n=3).

**Cell size for dermal fibroblast population 1**

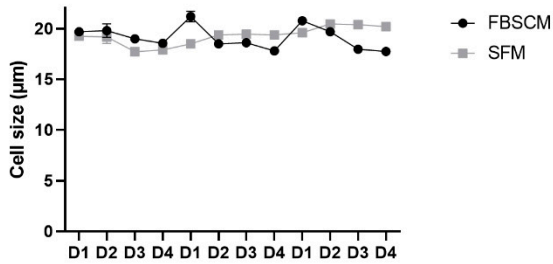

**Cell size for vesical fibroblast population 1**

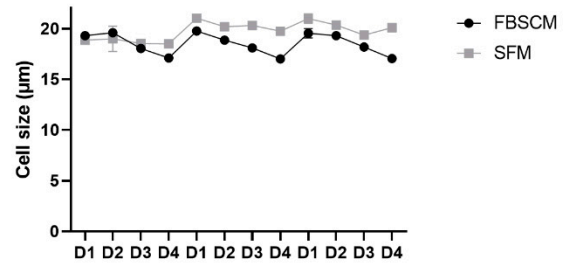

**Cell size for dermal fibroblast population 2**

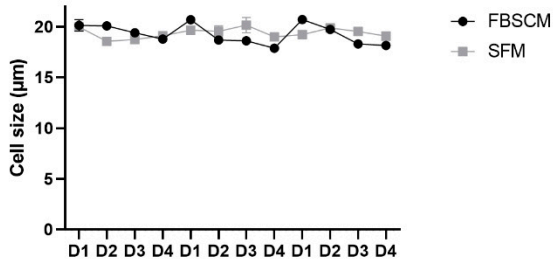

**Cell size for vesical fibroblast population 2**

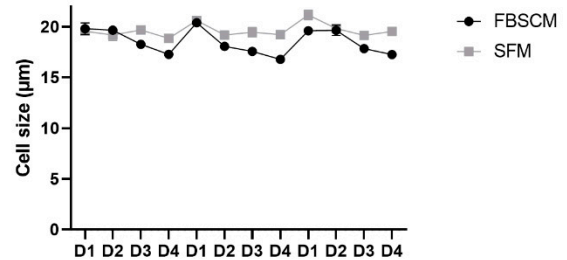

**Cell size for dermal fibroblast population 3**

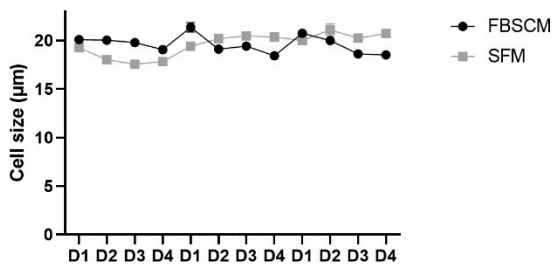

**Cell size for vesical fibroblast population 3**

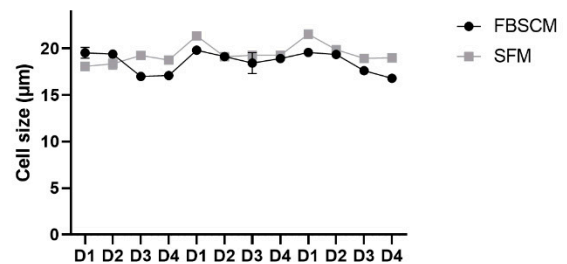

**Figure S3A: Doubling time of epithelial cells at passages 1, 2 and 3.**

Doubling time of epithelial cells over three passages. Ordinary two-way ANOVA has been used to interpret the data. Asterisks indicate significant differences: (\*) for p-value<0.05, (\*\*) for p-value<0.01. Each dot represents the mean of a cellular population realized in triplicate (n=3). Three points are presented as the experiment was done with three populations (N=3).

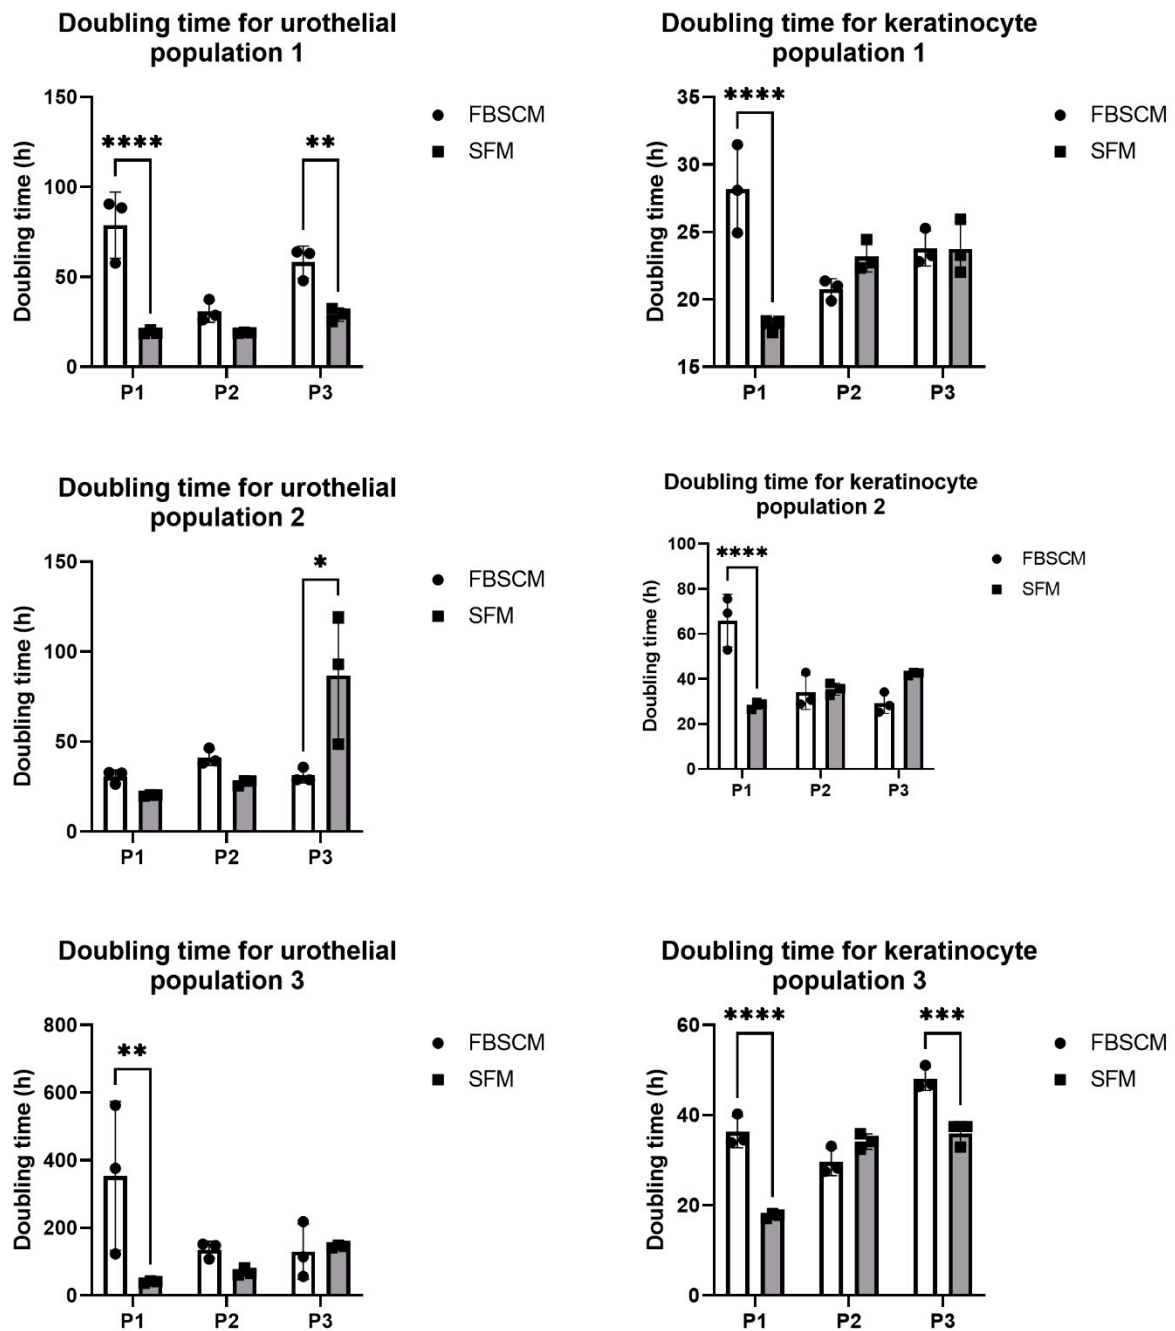

**Figure S3B: Doubling time of fibroblast cells at passages 1, 2 and 3.**

Doubling time of fibroblast cells over three passages. Ordinary two-way ANOVA has been used to interpret the data. Asterisks indicate significant differences: (\*) for  $p\text{-value} < 0.05$ , (\*\*) for  $p\text{-value} < 0.01$ . Each dot represents the mean of a cellular population realized in triplicate ( $n=3$ ). Three points are presented as the experiment was done with three populations ( $N=3$ ).



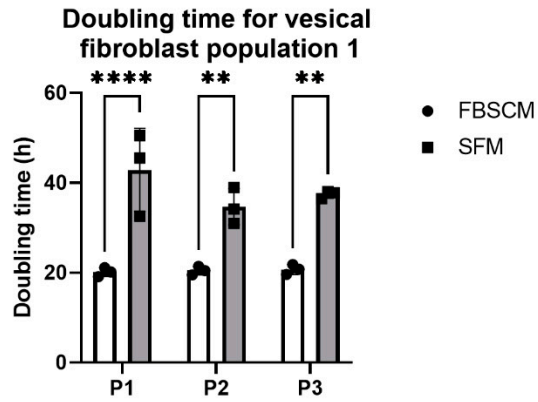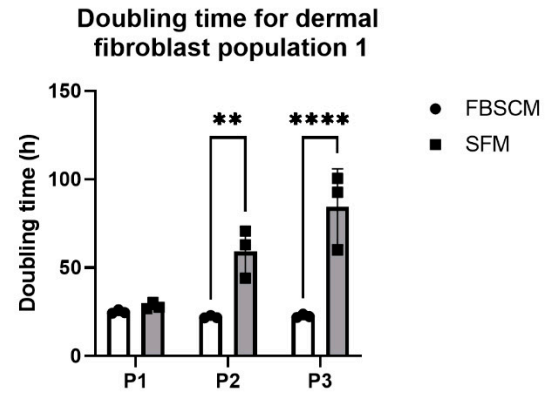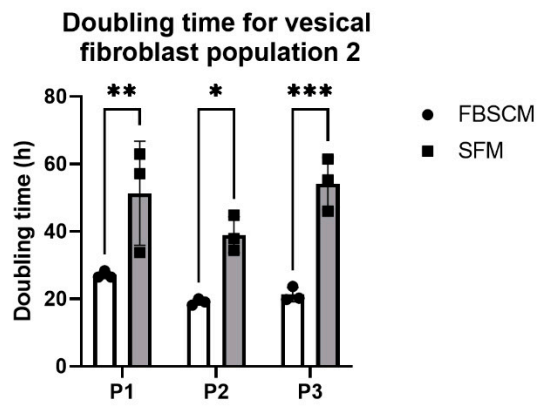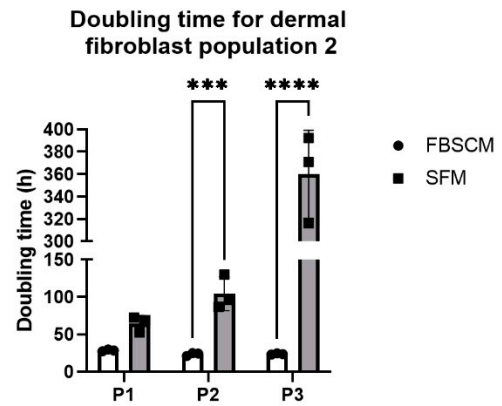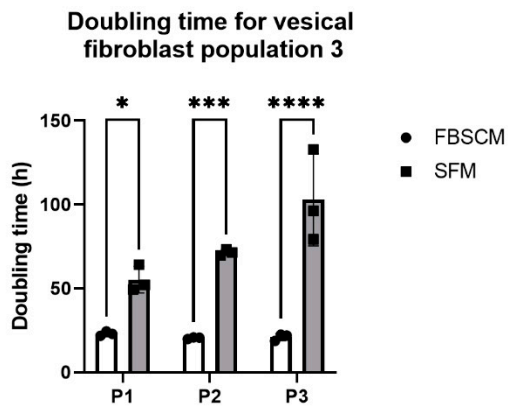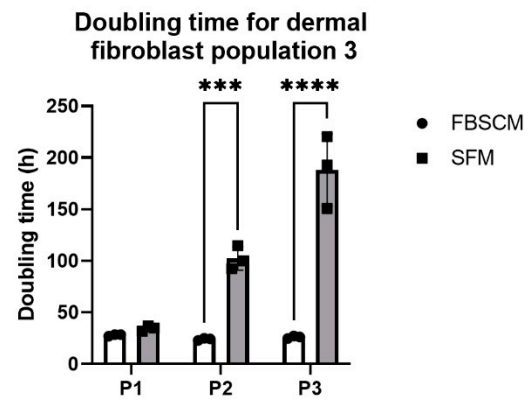

**Figure S4: Macroscopical aspect of the flasks for evaluation of the CFUs.**

Example of the macroscopic aspect of the same epithelial population in two flasks: (A) cell cultured in FBSCM and (B) cell culture in SFM.

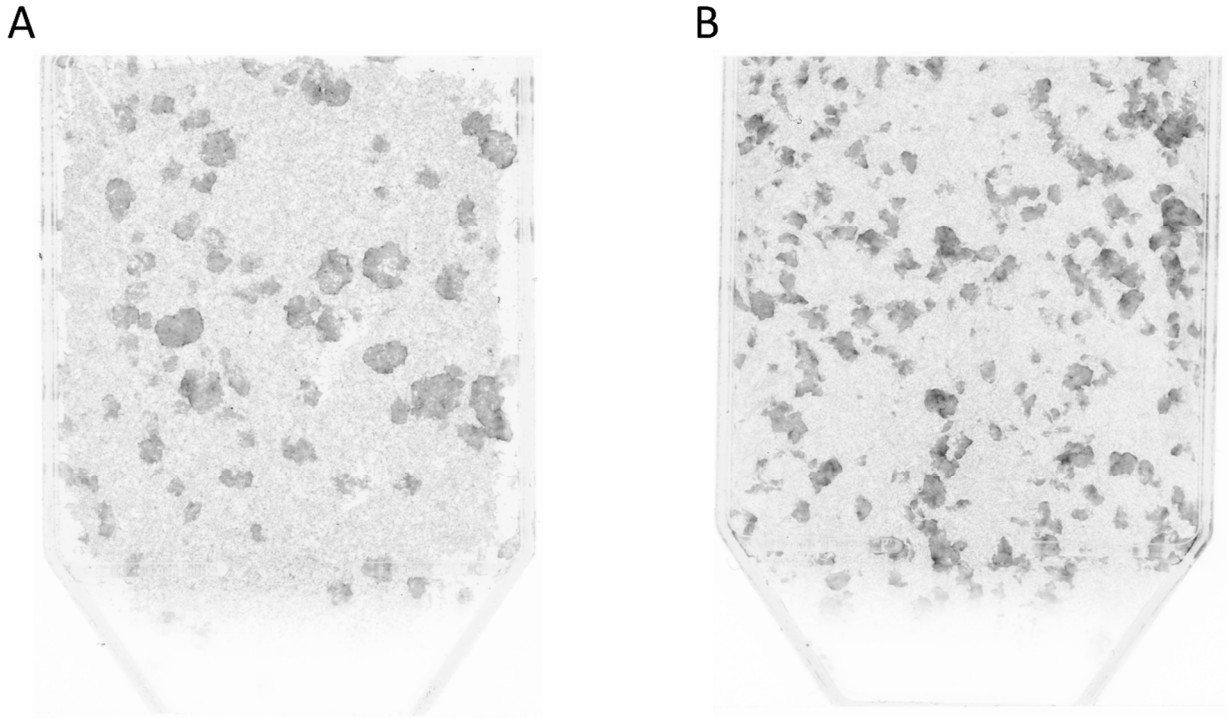

**Figure S5A: Clonogenicity evaluation using the count technique.**

Clonogenicity evaluation of keratinocytes (KC) and urothelial cells (UC) over three passages using the count technique. Ordinary two-way ANOVA has been used to interpret the data. Each dot represents the mean of a cellular population realized in triplicate ( $n=3$ ). Three points are presented as the experiment was done with three populations ( $N=3$ ).

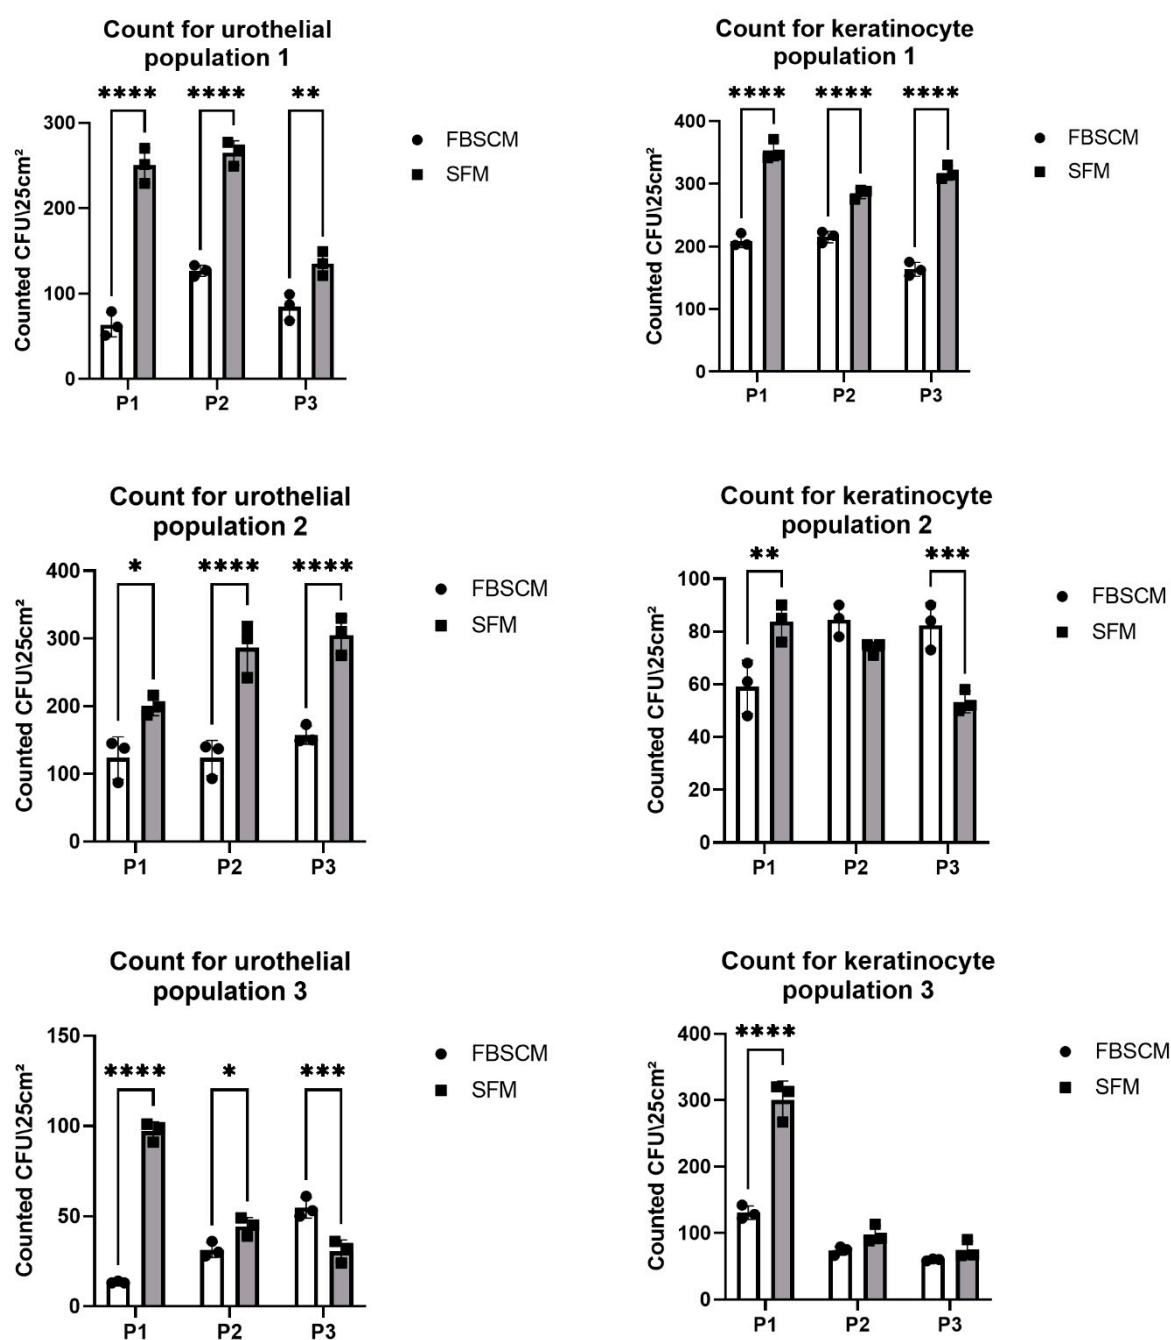

**Figure S5B: Clonogenicity evaluation using the scanning technique.**

Clonogenicity evaluation of keratinocytes (KC) and urothelial cells (UC) over three passages using the scanning technique. Ordinary two-way ANOVA has been used to interpret the data. Each dot represents the mean of a cellular population realized in

triplicate (n=3). Three points are presented as the experiment was done with three populations (N=3).

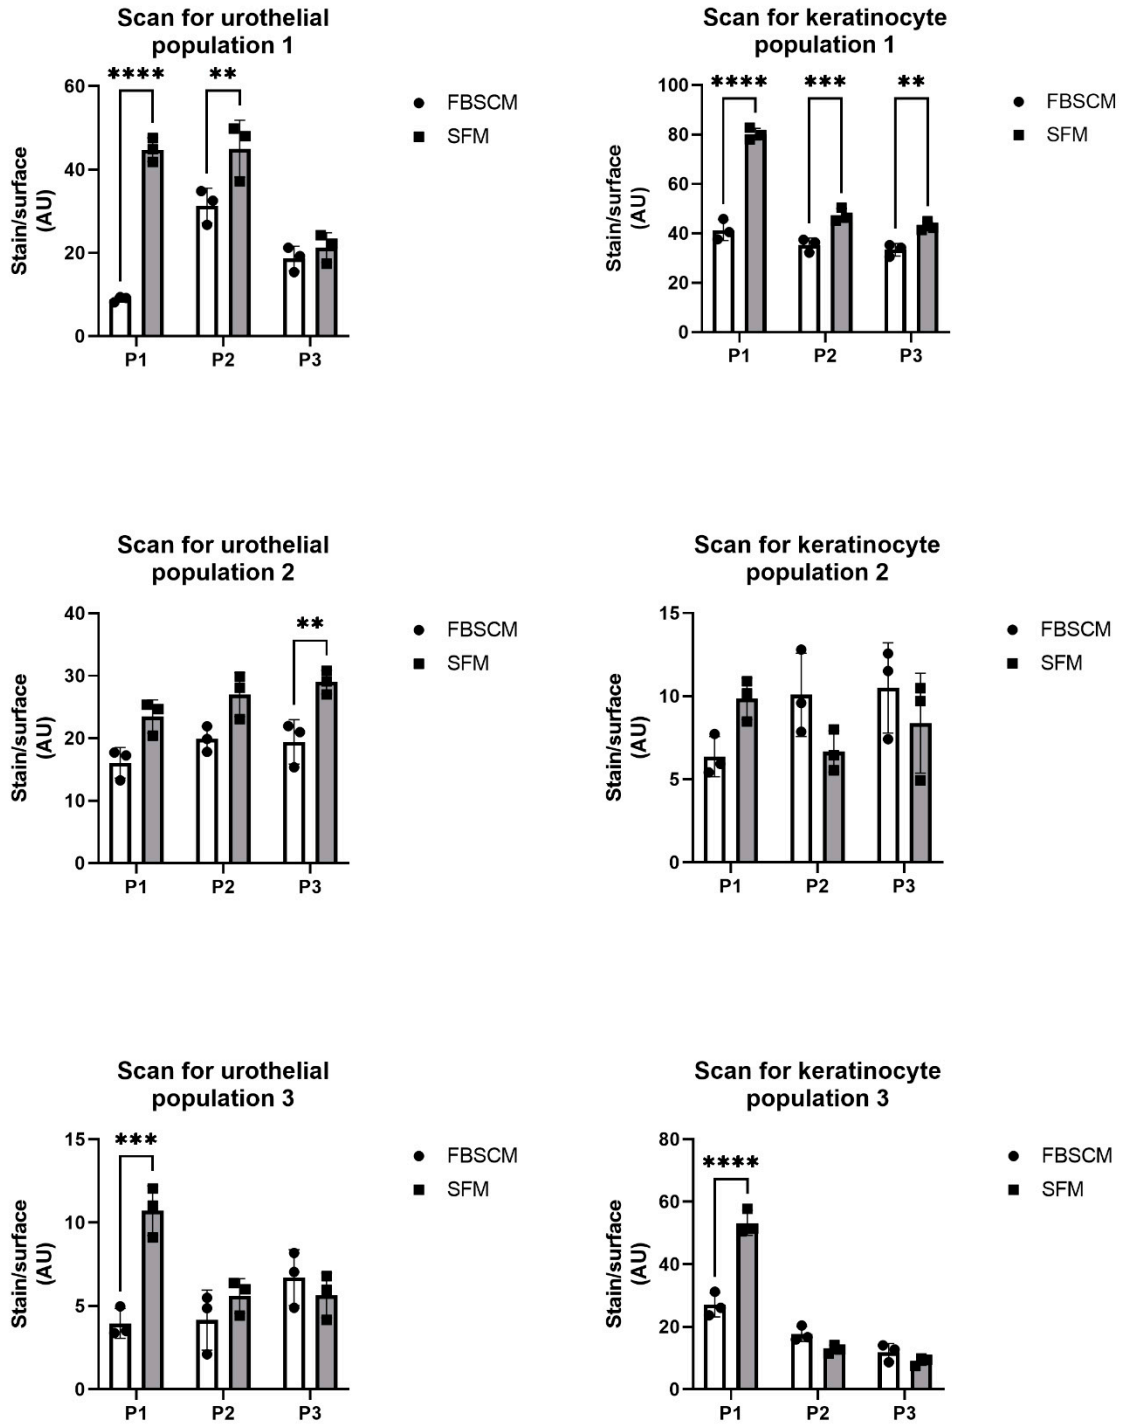

**Figure S6: Extraction from biopsy and expansion to passage P0**

Cell-count evaluation of keratinocytes (KC) after cell extraction and culture for six days, using the Coulter-Beckmann Z2 system. Four different experimenters have done the experimentation. Ordinary two-way ANOVA has been used to interpret the data. Each dot represents the mean of a cellular population realized in triplicate (n=3).

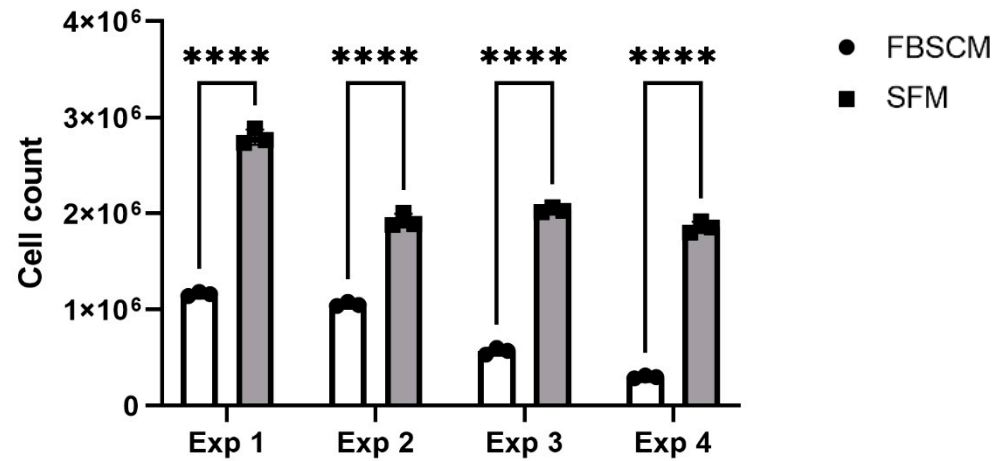

Supplement: s1 [file s1]
